# Supplementary material for: Creating a blue-light-excitable, ultra-broadband and relatively long-wavelength near-infrared emission in Cr3+-activated garnet by controlling cationic disorder
Source: Royal Society of Chemistry journal article supplement (doi:10.1039/d4cc02801e), 2024-01-01
Supplement: d4cc02801e1.pdf [file d4cc02801e1.pdf]

## Electronic Supplementary Information

### **Creating a blue-light excitable, ultra-broadband and relatively long-wavelength near-infrared emission in Cr<sup>3+</sup>-activated garnet via controlling cationic disorder**

Chaojie Li<sup>a</sup>, and Jiyou Zhong<sup>a,b,\*</sup>

<sup>a</sup>School of Physics and Optoelectronic Engineering, Guangdong University of Technology, Guangzhou 510006, China. E-mail: [jyzhong2016@gdut.edu.cn](mailto:jyzhong2016@gdut.edu.cn).

<sup>b</sup>Guangdong Provincial Key Laboratory of Sensing Physics and System Integration Applications, Guangdong University of Technology, Guangzhou 510006, China.

## Experimental Section

**S1. Synthesis :** Garnets with formula of  $\text{Na}_x\text{Ca}_{3-2x}\text{Gd}_x\text{In}_{2-y}\text{Cr}_y\text{Ge}_3\text{O}_{12}$  ( $x = 0, 0.3, 0.6, 0.9, 1.2,$  and  $1.5$ ;  $y = 0,$  and  $0.06$ ) were synthesized by high-temperature solid-state reaction. Firstly,  $\text{NaHCO}_3$  (Aladdin, 99.5%),  $\text{CaCO}_3$  (Aladdin, 99.5%),  $\text{Gd}_2\text{O}_3$  (Macklin, 99.99%),  $\text{In}_2\text{O}_3$  (Aladdin, 99.99%),  $\text{GeO}_2$  (Aladdin, 99.99%), and  $\text{Cr}_2\text{O}_3$  (Aladdin, 99.99%) were used as the raw materials and weighed according to the stoichiometric ratio. In addition, an excess of 5 wt%  $\text{NaHCO}_3$  were added to compensate for the loss of  $\text{Na}^+$  at high temperature and 5 wt%  $\text{CaF}_2$ ,  $\text{NaF}$ , and  $\text{NH}_4\text{F}$  were also added as flux, respectively. Secondly, the weighed raw materials were thoroughly ground in an agate mortar with a pestle for 30 minutes. Then, the mixtures were transferred to a corundum crucible and sent to a tube furnace for sintering. The sintering process was set to heat at  $1350\text{ }^\circ\text{C}$  for 8 hours in air, with a heating and cooling rate of  $3\text{ }^\circ\text{C}/\text{min}$ . Finally, after cooling to room temperature, the products were thoroughly ground to a fine powder for subsequent measurements.

**S2. Characterization :** The phase purity of samples was confirmed using powder X-ray diffraction obtained by the X'Pert<sup>3</sup> PANalytical diffractometer ( $\text{Cu K}\alpha$ ,  $\lambda = 1.5406\text{ \AA}$ ). Rietveld refinements of the diffractograms was performed using the General Structure Analysis System (GSAS) software and EXPGUI interface with a shifted Chebyshev function employed to describe the background.<sup>1</sup> The crystal structure was analyzed and visualized by VESTA.<sup>2</sup> Raman spectra were measured using a solid-state laser excitation (532 nm) on InVia Raman Microscope (Renishaw, England). A UV-vis-NIR spectrophotometer (UV-3600 Plus, Shimadzu, Japan) was used to measure the diffuse reflectance (DR) spectra of these garnet samples. The room-temperature photoluminescence excitation (PLE), photoluminescence emission (PL), and decay curves of the as-prepared samples were measured using the FLS-1000 fluorescence spectrophotometer (Edinburgh Instruments), which equipped with a Xenon flash lamp (450 W, Osram) as the excitation source and a liquid-nitrogen cooled NIR photomultiplier tube as a detector (Hamamatsu, R5509, InP/InGaAsP). The internal quantum efficiency (IQE) and absorption efficiency (AE) were determined on a Quantaaurus-QY Plus C13534-11 (Hamamatsu Photonics) based on the integrating sphere with spectralon as a reference. The prototype NIR

pc-LED was fabricated by coating the mixture of  $\text{Na}_x\text{Ca}_{3-2x}\text{Gd}_x\text{In}_{1.94}\text{Ge}_3\text{O}_{12}:0.06\text{Cr}^{3+}$  ( $x = 0, 0.6,$  and  $1.5$ ) phosphors and resin in a ratio of 1:1 (in weight) onto a 455 nm LED chip. The NIR photoelectric properties of the as-prepared pc-LED device were recorded using a HAAS2000 photoelectric measurement system (EVERFINE, China).

## Supplementary Equations

The crystal field strength parameter ( $Dq/B$ ) estimated by the following equations:<sup>3,4</sup>

$$10Dq = E(^4A_2 \rightarrow ^4T_2) - \Delta S / 2 \quad (\text{Eqn. S1})$$

$$Dq/B = \frac{15(m - 8)}{m^2 - 10m} \quad (\text{Eqn. S2})$$

$$m = \frac{E(^4A_2 \rightarrow ^4T_1) - E(^4A_2 \rightarrow ^4T_2)}{Dq} \quad (\text{Eqn. S3})$$

where  $Dq$  and  $B$  represents crystal field splitting energy and the Racah parameter, respectively; while  $E(^4A_2 \rightarrow ^4T_1)$  and  $E(^4A_2 \rightarrow ^4T_2)$  correspond to the peak positions of the excitation bands of the  $^4T_1$  and  $^4T_2$  levels.

The curves can be well fitted by a single-exponential function:<sup>5</sup>

$$I_t = I_0 \exp\left(-\frac{t}{\tau}\right) \quad (\text{Eqn. S4})$$

where  $I_t$  represents the emission intensity at time  $t$ ,  $I_0$  is the initial intensity at  $t = 0$ , and  $\tau$  is the calculated lifetime.

## Supplementary Figures and Tables

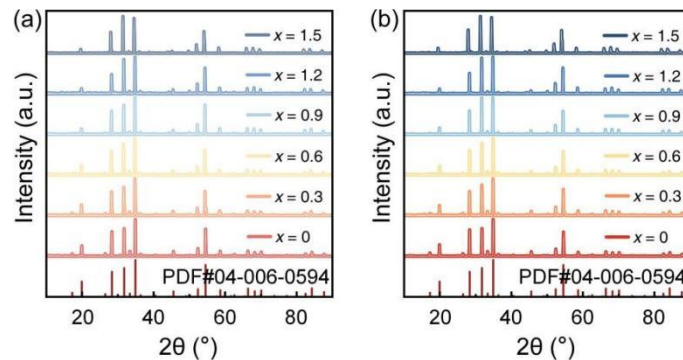

**Fig. S1.** (a-b) XRD patterns of the  $\text{Na}_x\text{Ca}_{3-2x}\text{Gd}_x\text{In}_{2-y}\text{Ge}_3\text{O}_{12}:\text{yCr}^{3+}$  ( $x = 0-1.5$ ;  $y = 0$  and  $0.06$ ) samples compared with the standard XRD pattern.

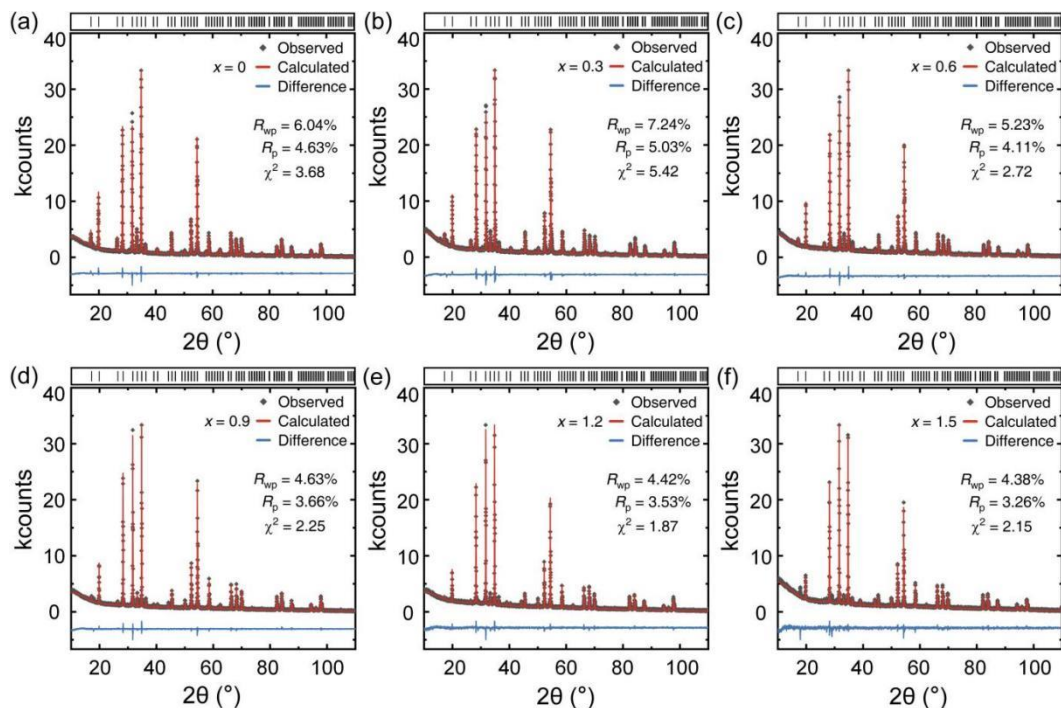

**Fig. S2.** (a-f) Rietveld refinement of XRD pattern for  $\text{Na}_x\text{Ca}_{3-2x}\text{Gd}_x\text{In}_{1.94}\text{Ge}_3\text{O}_{12}:0.06\text{Cr}^{3+}$  ( $x = 0-1.5$ ) samples.

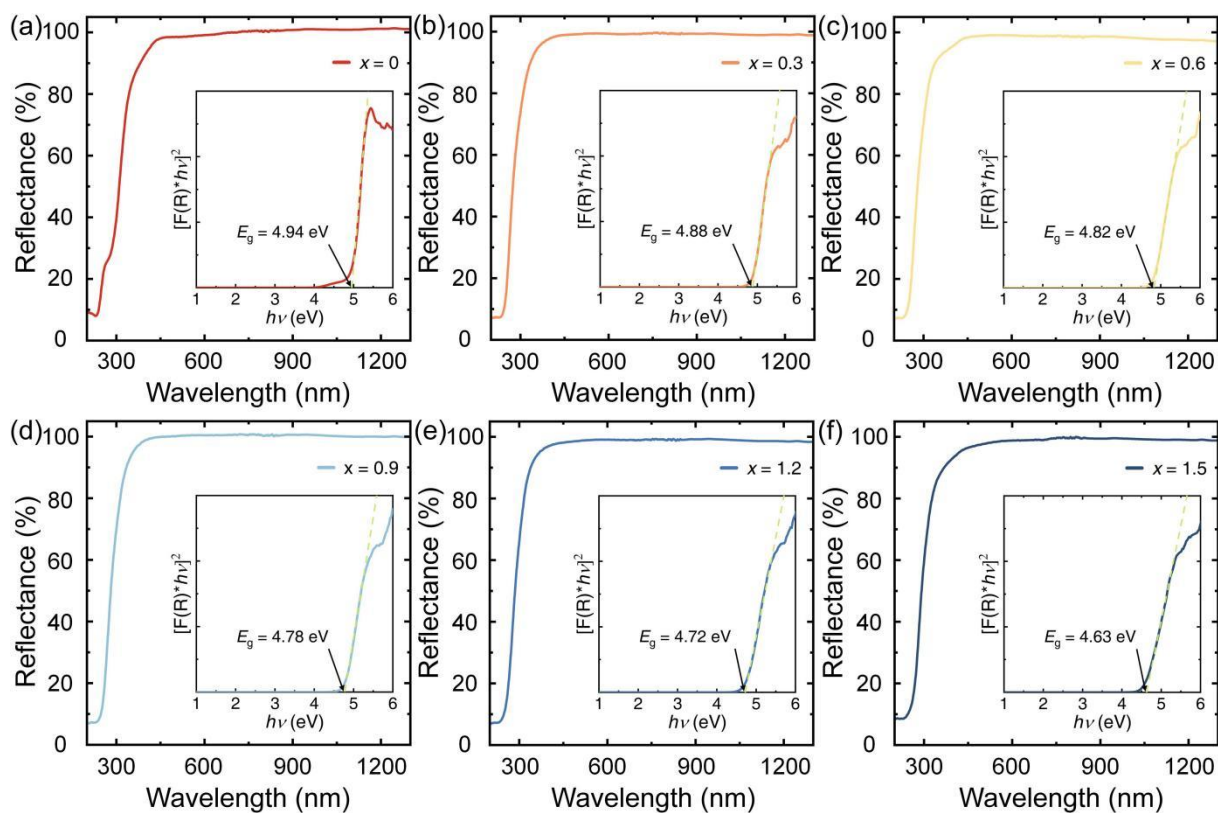

**Fig. S3.** (a-f) Diffraction reflection (DR) spectra and optical band gap (inset) of  $\text{Na}_x\text{Ca}_{3-2x}\text{Gd}_x\text{In}_{1.94}\text{Ge}_3\text{O}_{12}:0.06\text{Cr}^{3+}$  ( $x = 0-1.5$ ) samples.

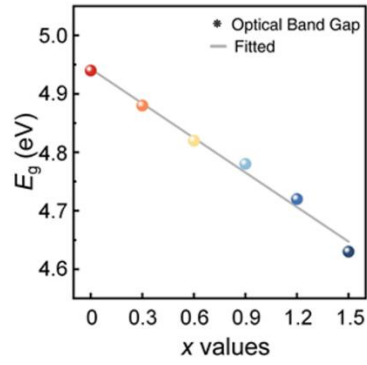

**Fig. S4.** Linearly fitting the optical band gap of  $\text{Na}_x\text{Ca}_{3-2x}\text{Gd}_x\text{In}_{1.94}\text{Ge}_3\text{O}_{12}:0.06\text{Cr}^{3+}$  ( $x = 0-1.5$ ) as function of  $x$ .

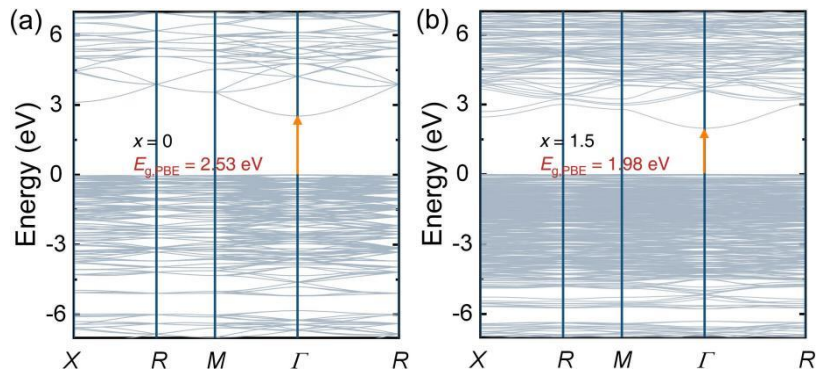

**Fig. S5.** (a-b) The band structures of  $\text{Na}_x\text{Ca}_{3-2x}\text{Gd}_x\text{In}_2\text{Ge}_3\text{O}_{12}$  ( $x = 0$  and  $1.5$ ) hosts.

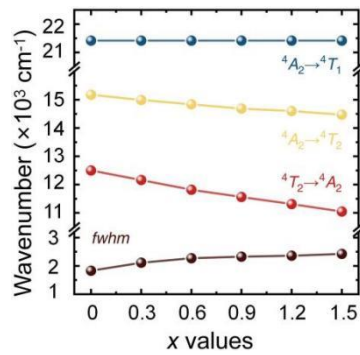

**Fig. S6.** Excitation and emission energy, and *fwhm* as a function of  $x$  value.

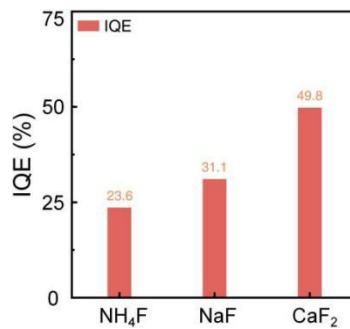

**Fig. S7.** IQE, AE, and EQE of  $\text{Na}_{1.5}\text{Gd}_{1.5}\text{In}_2\text{Ge}_3\text{O}_{12}:\text{Cr}^{3+}$  by optimized sintering using different fluxes.

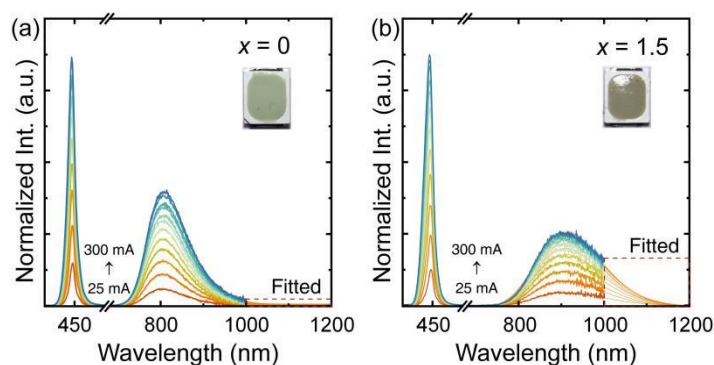

**Fig. S8.** (a-b) Electroluminescence spectra of NIR pc-LED devices (inset) fabricated by using  $\text{Na}_x\text{Ca}_{3-2x}\text{Gd}_x\text{In}_{1.94}\text{Ge}_3\text{O}_{12}:0.06\text{Cr}^{3+}$  ( $x = 0$  and  $1.5$ ) samples.

**Table S1** Refined results of  $\text{Na}_x\text{Ca}_{3-2x}\text{Gd}_x\text{In}_{1.94}\text{Ge}_3\text{O}_{12}:0.06\text{Cr}^{3+}$  ( $x = 0, 0.6, \text{ and } 1.5$ ) Samples.

| x values                                | x = 0          | x = 0.6        | x = 1.5        |
|-----------------------------------------|----------------|----------------|----------------|
| Radiation type; $\lambda$ (Å)           | X-ray; 1.5406  | X-ray; 1.5406  | X-ray; 1.5406  |
| $2\theta$ (degree)                      | 10 - 120       | 10 - 120       | 10 - 120       |
| Temperature (K)                         | 298            | 298            | 298            |
| Space group                             | <i>Ia</i> $3d$ | <i>Ia</i> $3d$ | <i>Ia</i> $3d$ |
| $\alpha = \beta = \gamma$ (degree)      | 90.00          | 90.00          | 90.00          |
| $a = b = c$ (Å)                         | 12.56453(7)    | 12.58451(9)    | 12.61052(6)    |
| $V$ (Å <sup>3</sup> )                   | 1983.53(3)     | 1993.01(2)     | 2005.39(4)     |
| Profile R-factor, $R_p$ (%)             | 0.0463         | 0.0411         | 0.0326         |
| Weighted profile R-factor, $R_{wp}$ (%) | 0.0604         | 0.0523         | 0.0438         |
| $\chi^2$                                | 3.68           | 2.72           | 2.15           |

**Table S2.** Refined atomic position of  $\text{Na}_x\text{Ca}_{3-2x}\text{Gd}_x\text{In}_{1.94}\text{Ge}_3\text{O}_{12}:0.06\text{Cr}^{3+}$  ( $x = 0, 0.6, \text{ and } 1.5$ ) Samples.

| x values | Atom | Wyck. position | Occupation | x          | y          | z          |
|----------|------|----------------|------------|------------|------------|------------|
| x = 0    | Ca   | 24c            | 1          | 0.12500(0) | 0          | 0.25000(0) |
|          | In   | 16a            | 0.97       | 0          | 0          | 0          |
|          | Ge   | 24d            | 1          | 0.37500(0) | 0          | 0.25000(0) |
|          | O    | 96h            | 1          | 0.08685(6) | 0.19167(2) | 0.28295(7) |
|          | Cr   | 16a            | 0.03       | 0          | 0          | 0          |
| x = 0.6  | Na   | 24c            | 0.2        | 0.12500(0) | 0          | 0.25000(0) |
|          | Ca   | 24c            | 0.8        | 0.12500(0) | 0          | 0.25000(0) |
|          | Gd   | 24c            | 0.2        | 0.12500(0) | 0          | 0.25000(0) |
|          | In   | 16a            | 0.97       | 0          | 0          | 0          |
|          | Ge   | 24d            | 1          | 0.37500(0) | 0          | 0.25000(0) |
|          | O    | 96h            | 1          | 0.09034(3) | 0.19106(3) | 0.28588(3) |
|          | Cr   | 16a            | 0.03       | 0          | 0          | 0          |
| x = 1.5  | Na   | 24c            | 0.5        | 0.12500(0) | 0          | 0.25000(0) |
|          | Gd   | 24c            | 0.5        | 0.12500(0) | 0          | 0.25000(0) |
|          | In   | 16a            | 0.97       | 0          | 0          | 0          |
|          | Ge   | 24d            | 1          | 0.37500(0) | 0          | 0.25000(0) |
|          | O    | 96h            | 1          | 0.08795(2) | 0.19541(1) | 0.28399(0) |

Cr      16a                      0.03                      0                      0                      0

**Table S3.** Local coordination of octahedral site in  $\text{Na}_x\text{Ca}_{3-2x}\text{Gd}_x\text{In}_{1.94}\text{Cr}_{0.06}\text{Ge}_3\text{O}_{12}$  ( $x = 0, 0.6,$  and  $1.5$ ).

| x values | Bonds | Bond length (Å) | O-In-O bond angle (°) | Distortion index | $\sigma$ |
|----------|-------|-----------------|-----------------------|------------------|----------|
| x = 0    | In-O  | 2.207(3)        | 86.131(3)             | 0                | 4.04     |
|          |       |                 | 86.131(3)             |                  |          |
|          |       | 2.207(3)        | 93.871(3)             |                  |          |
|          |       |                 | 93.871(3)             |                  |          |
|          |       | 2.207(3)        | 86.131(3)             |                  |          |
|          |       |                 | 93.871(3)             |                  |          |
|          |       |                 | 93.871(3)             |                  |          |
| x = 0.6  | In-O  | 2.189(4)        | 87.031(6)             | 0                | 3.10     |
|          |       |                 | 87.031(6)             |                  |          |
|          |       | 2.189(4)        | 92.971(6)             |                  |          |
|          |       |                 | 92.971(6)             |                  |          |
|          |       | 2.189(4)        | 87.031(6)             |                  |          |
|          |       |                 | 87.031(6)             |                  |          |
|          |       | 2.189(4)        | 92.971(6)             |                  |          |
|          |       |                 | 92.971(6)             |                  |          |
|          |       |                 | 92.971(6)             |                  |          |
| x = 1.5  | In-O  | 2.175(5)        | 87.282(4)             | 0                | 2.84     |
|          |       |                 | 87.282(4)             |                  |          |
|          |       | 2.175(5)        | 92.722(4)             |                  |          |
|          |       |                 | 92.722(4)             |                  |          |
|          |       | 2.175(5)        | 87.282(4)             |                  |          |
|          |       |                 | 87.282(4)             |                  |          |
|          |       |                 | 92.722(4)             |                  |          |

**Table S4.** The Crystal Field Parameters and of  $\text{Na}_x\text{Ca}_{3-2x}\text{Gd}_x\text{In}_{1.94}\text{Ge}_3\text{O}_{12}:0.06\text{Cr}^{3+}$  ( $x = 0 - 1.5$ ) Samples.

| x values | $E(^4T_1)$ ( $\text{cm}^{-1}$ ) | $E(^4T_2)$ ( $\text{cm}^{-1}$ ) | $E(^4T_2 \rightarrow ^4A_2)$ ( $\text{cm}^{-1}$ ) | $Dq$ ( $\text{cm}^{-1}$ ) | $B$ ( $\text{cm}^{-1}$ ) | $Dq/B$ |
|----------|---------------------------------|---------------------------------|---------------------------------------------------|---------------------------|--------------------------|--------|
| 0        | 21413                           | 15175                           | 12500                                             | 1384                      | 654                      | 2.12   |
| 0.3      | 21413                           | 14993                           | 12165                                             | 1358                      | 690                      | 1.97   |
| 0.6      | 21413                           | 14837                           | 11820                                             | 1333                      | 724                      | 1.84   |
| 0.9      | 21413                           | 14684                           | 11561                                             | 1312                      | 761                      | 1.72   |
| 1.2      | 21413                           | 14599                           | 11312                                             | 1296                      | 786                      | 1.65   |
| 1.5      | 21413                           | 14472                           | 11050                                             | 1276                      | 824                      | 1.55   |

## Supplementary References

- 1 B. H. Toby and R. B. Von Dreele, *J. Appl. Crystallogr.*, 2013, **46**, 544–549.
- 2 K. Momma and F. Izumi, *J. Appl. Crystallogr.*, 2011, **44**, 1272–1276.
- 3 Y. Tanabe and S. Sugano, *J. Phy. Soc. Japan*, 1954, **9**, 766–779.
- 4 X. Zhou, W. Geng, J. Li, Y. Wang, J. Ding and Y. Wang, *Adv. Opt. Mater.*, 2020, **8**, 1–8.
- 5 Z. Xia and R. Liu, *J. Phy. Chem. C*, 2012, **116**, 15604–15609.
